# Supplementary material for: Transcultural adaptation and validation of the questionnaire “Urgency, Weak stream, Incomplete emptying and Nocturia (UWIN)” for the Brazilian Portuguese
Source: PeerJ. 2020 May 25;8:e9039. doi: 10.7717/peerj.9039 (PMC7255330; doi:10.7717/peerj.9039)
Supplement: Supplemental Information 1 [file peerj-08-9039-s001.xlsx]

## Sheet: Plan1
Age	Education	Flowmax	IPSS1	IPSS2	IPSS3	IPSS4	IPSS5	IPSS6	IPSS7	IPSSQOL	SCOIPSS	CLASIPSS	UWIN1	UWIN2	UWIN3	UWIN4	UWINQOL	SCOUWIN	tap UWINmin	tap IPSS	MOD
72	3	20.6	0	0	0	0	0	0	0	0	0	0	0	0	0	0	0	0	1.27	3.4	1
73	8	17	0	0	0	0	0	0	0	0	0	0	0	0	0	0	0	0	1.01	1.31	1
41	11	27.3	0	1	0	0	0	0	0	0	1	0	0	0	0	0	0	0	0.29	1.3	0
41	11	17.5	0	0	0	0	0	0	0	0	0	0	0	0	0	0	0	0	0.47	1.28	0
42	11	14.4	0	1	0	0	0	0	0	0	1	0	0	0	0	0	0	0	0.31	2.09	0
42	15	18.9	0	0	0	0	0	0	0	0	0	0	0	0	0	0	0	0	1.13	3.53	0
46	11	22.2	0	1	0	0	0	0	0	0	1	0	0	0	0	0	0	0	0.27	1.56	0
47	11	26.5	0	0	0	0	0	0	0	0	0	0	0	0	0	0	0	0	0.25	2.18	0
48	11	7.7	0	0	0	0	0	0	0	0	0	0	0	0	0	0	0	0	0.44	1.31	0
50	11	43.6	0	0	0	0	0	1	0	0	1	0	0	0	0	0	0	0	1.06	5.03	0
52	15	9.8	0	0	0	0	0	0	0	0	0	0	0	0	0	0	0	0	2.38	2	0
53	11	19.1	0	0	0	0	0	0	0	0	0	0	0	0	0	0	0	0	0.49	2.2	0
54	11	26.5	5	4	0	0	0	0	0	0	9	1	0	0	0	0	0	0	1.48	2.05	0
55	11	10	0	0	0	0	0	1	0	0	1	0	0	0	0	0	0	0	1.27	2.27	0
56	15	10.6	0	0	0	0	0	0	0	0	0	0	0	0	0	0	0	0	0.56	2.26	0
56	15	19.4	0	0	0	0	0	0	0	0	0	0	0	0	0	0	0	0	1.08	2.34	0
57	11	13.2	0	0	0	0	0	0	0	0	0	0	0	0	0	0	0	0	2.1	3.34	0
59	14	17.6	0	0	0	0	0	0	0	0	0	0	0	0	0	0	0	0	1.22	5.39	0
59	11	10.1	0	0	0	0	0	0	0	0	0	0	0	0	0	0	0	0	1.23	2.2	0
60	14	4.3	0	0	0	0	0	0	0	0	0	0	0	0	0	0	0	0	0.52	1.15	0
61	15	79.9	5	5	0	0	0	0	0	0	10	1	0	0	0	0	0	0	1.01	2.04	0
65	15	15.6	0	0	0	0	0	0	0	0	0	0	0	0	0	0	0	0	1.09	2.01	0
71	15	27	0	0	0	0	0	0	0	0	0	0	0	0	0	0	0	0	0.46	3.1	0
74	3	15.4	0	1	0	0	0	0	0	0	1	0	0	0	0	0	0	0	0.44	2.07	0
46	13	12.8	0	5	0	1	0	0	0	1	6	0	0	0	0	0	0	0	0.44	2.18	0
52	15	23.4	1	1	0	0	0	0	0	2	2	0	0	0	0	0	0	0	1.08	2.4	0
53	15	11.1	1	0	0	2	0	0	0	2	3	0	0	0	0	0	0	0	1.16	3.29	0
65	11	25.8	5	5	0	5	5	0	0	2	20	2	0	0	0	0	0	0	1.33	3.19	0
43	11	17.6	1	1	0	0	0	0	0	0	2	0	0	0	1	0	0	1	1.18	3.23	0
46	11	18	0	0	0	0	0	0	1	0	1	0	0	0	0	1	0	1	1.15	2.21	0
47	15	13.8	0	0	0	0	0	0	1	0	1	0	0	0	0	1	0	1	1.34	3.15	0
48	11	30.7	0	1	0	0	0	0	2	0	3	0	0	0	0	1	0	1	1.11	2.26	0
48	15	19.1	0	0	0	0	0	0	1	0	1	0	0	0	0	1	0	1	2.36	14	0
50	10	8.8	0	0	1	0	0	0	1	0	2	0	0	0	0	1	0	1	1	2.25	0
50	11	43.4	0	1	0	0	0	0	1	0	2	0	0	0	0	1	0	1	1.05	2.23	0
50	15	27.3	0	0	0	0	0	0	1	0	1	0	0	0	0	1	0	1	1.21	4.44	0
51	11	8.6	0	0	0	0	0	0	1	0	1	0	0	0	0	1	0	1	1.59	2.39	0
51	11	14.7	0	0	0	0	0	0	2	0	2	0	0	0	0	1	0	1	2.37	9.28	0
52	15	48.8	0	0	0	0	0	0	1	0	1	0	0	0	0	1	0	1	0.41	1.14	0
52	9	25.3	0	0	0	0	0	0	2	0	2	0	0	0	0	1	0	1	1.32	6.53	0
53	11	5	0	5	0	0	0	0	1	0	6	0	0	0	0	1	0	1	0.58	3.11	0
54	11	18.5	0	0	0	1	1	0	2	0	4	0	0	0	0	1	0	1	1.08	2.55	0
54	15	15.8	0	0	0	0	0	0	1	0	1	0	0	0	0	1	0	1	3.25	5.38	0
55	11	21.1	0	0	0	0	0	0	1	0	1	0	0	0	0	1	0	1	1.03	1.55	0
56	11	10.3	0	2	0	1	0	0	2	0	5	0	0	0	0	1	0	1	1.02	2.45	0
57	11	16.1	0	1	1	0	0	0	0	0	2	0	1	0	0	0	0	1	2.24	2.26	0
58	15	15.3	0	1	0	0	0	0	1	0	2	0	0	0	0	1	0	1	0.31	1.43	0
58	15	9	0	0	0	0	0	0	1	0	1	0	0	0	0	1	0	1	1	3.12	0
58	11	24.8	0	1	0	0	0	0	1	0	2	0	0	0	0	1	0	1	1.03	4.28	0
59	9	35.7	0	1	0	0	0	0	1	0	2	0	0	0	0	1	0	1	0.41	1.58	0
60	8	7.9	0	1	0	0	0	0	2	0	3	0	0	0	0	1	0	1	1.28	1.31	0
61	1	18.9	0	0	0	0	0	0	2	0	2	0	0	0	0	1	0	1	1.5	3.06	0
67	15	12.5	0	1	0	1	0	0	1	0	3	0	0	0	0	1	0	1	0.57	1.46	0
79	4	54.6	0	0	0	0	0	0	2	0	2	0	0	0	0	1	0	1	1.2	2.5	0
40	11	22.6	0	0	0	0	0	0	2	1	2	0	0	0	0	1	0	1	0.54	1.49	0
43	15	35.7	0	5	0	0	0	0	2	1	7	0	0	0	0	1	0	1	1.17	2.28	0
44	11	40.1	0	0	0	0	0	0	2	1	2	0	0	0	0	1	0	1	0.51	3.07	0
48	15	26.2	0	0	1	0	0	0	2	1	3	0	0	0	0	1	0	1	0.53	2.27	0
51	11	27.3	0	1	0	0	0	0	1	1	2	0	0	0	0	1	0	1	0.38	1.4	0
52	11	35.2	5	0	1	0	0	1	0	1	7	0	0	1	0	0	0	1	0.48	3.04	0
52	11	20.2	1	0	0	0	1	0	0	1	2	0	0	1	0	0	0	1	0.52	1.54	0
52	11	29	3	2	2	3	2	0	1	1	13	1	0	0	0	1	0	1	1.19	3.54	0
53	11	11.5	0	0	5	0	2	0	0	1	7	0	0	1	0	0	0	1	0.56	2.11	0
57	8	19.5	0	4	0	0	0	0	2	1	6	0	0	0	0	1	0	1	1.21	2.48	0
58	11	41.9	0	5	0	0	0	0	1	1	6	0	0	0	0	1	0	1	0.53	2.11	0
59	12	10.9	0	5	0	0	0	0	2	1	7	0	0	0	0	1	0	1	1.19	3.03	0
60	8	28.3	0	3	0	0	0	0	2	1	5	0	0	0	0	1	0	1	1.55	3.22	0
60	11	23.4	0	0	0	0	0	0	0	1	0	0	0	0	0	1	0	1	2.13	2.52	0
65	2	10.5	0	0	0	0	0	0	2	1	2	0	0	0	0	1	0	1	1.29	2.53	0
79	11	6.3	0	0	0	0	0	0	1	1	1	0	0	0	0	1	0	1	1.41	3.38	0
47	5	30.6	0	3	0	0	0	0	2	2	5	0	0	0	0	1	0	1	1.27	2.24	1
62	11	24	0	0	0	0	0	0	1	2	1	0	0	0	0	1	0	1	0.55	2.05	1
67	8	35.7	0	0	0	0	0	0	2	2	2	0	0	0	0	1	0	1	1.19	1.57	1
48	11	29	0	1	0	0	0	0	1	2	2	0	0	0	0	1	0	1	1.23	2.57	0
49	15	28.3	0	1	1	0	1	1	0	2	4	0	0	1	0	0	0	1	0.4	2.03	0
54	11	23.9	0	0	0	0	0	0	2	2	2	0	0	0	0	1	0	1	1.04	2.48	0
55	4	20.9	0	0	0	0	0	0	2	2	2	0	0	0	0	1	0	1	2.01	3.16	0
59	13	24.1	0	1	1	0	0	1	1	2	4	0	0	0	0	1	0	1	3.18	2.2	0
68	11	5.4	0	0	0	0	0	0	2	2	2	0	0	0	0	1	0	1	1.03	4.03	0
42	15	18.5	0	0	1	0	1	0	3	0	5	0	0	0	0	2	0	2	1.28	3.25	0
42	15	23	0	0	0	0	1	0	1	0	2	0	0	1	0	1	0	2	1.47	4.05	0
45	15	22	0	0	0	0	1	0	1	0	2	0	0	1	0	1	0	2	2.23	8.43	0
46	11	23.4	0	2	0	0	0	0	2	0	4	0	0	1	0	1	0	2	2.17	3.27	0
47	11	9.2	0	0	0	0	1	0	1	0	2	0	0	1	0	1	0	2	1.23	2.32	0
48	11	8.2	0	0	0	0	0	0	2	0	2	0	0	1	0	1	0	2	1.08	2.5	0
53	11	6.1	0	1	0	0	1	1	1	0	4	0	0	1	0	1	0	2	1.3	3.23	0
58	11	13.8	0	0	0	0	2	0	2	0	4	0	0	1	0	1	0	2	0.57	1.4	0
59	15	14.8	0	1	1	0	4	0	2	0	8	1	0	1	0	1	0	2	1.25	2	0
60	8	10.8	0	2	0	0	0	0	2	0	4	0	0	0	1	1	0	2	1.26	2.48	0
63	11	11.3	0	5	0	0	0	0	2	0	7	0	0	0	1	1	0	2	1.29	2.4	0
65	1	13.9	0	1	0	0	0	0	2	0	3	0	0	0	1	1	0	2	1.21	2.42	0
66	11	24.8	0	5	0	0	3	0	3	0	11	1	0	0	0	2	0	2	2.12	3.28	0
69	3	12.3	0	2	2	0	0	0	3	1	7	0	0	0	0	2	0	2	1.1	2.2	1
74	5	13.4	0	0	0	0	0	0	2	1	2	0	0	1	0	1	0	2	1.42	2.49	1
42	11	28.7	0	2	0	1	1	2	1	1	7	0	1	0	0	1	0	2	0.53	2.47	0
47	8	33.3	0	1	0	0	0	0	2	1	3	0	0	0	0	2	0	2	1.47	2.43	0
48	11	16.6	1	1	0	0	1	0	0	1	3	0	0	1	1	0	0	2	0.41	2.03	0
50	11	14.4	0	1	0	0	1	0	1	1	3	0	0	1	0	1	0	2	0.53	3.27	0
53	11	28.1	2	2	2	0	0	0	2	1	8	1	0	1	0	1	0	2	1.51	2.1	0
55	11	12.2	0	0	0	0	1	1	0	1	2	0	1	1	0	0	0	2	1.2	3.07	0
55	4	9.9	0	0	1	0	1	0	1	1	3	0	0	1	0	1	0	2	1.34	2.48	0
58	11	11.1	1	0	0	0	0	1	2	1	4	0	0	1	0	1	0	2	1.01	3.16	0
61	0	8.6	0	0	3	0	0	2	3	1	8	1	0	0	0	2	0	2	1.33	3.57	0
62	8	31.6	1	0	1	0	0	1	2	1	5	0	0	0	1	1	0	2	1.43	2.27	0
62	8	17.6	0	0	0	0	0	0	1	1	1	0	0	1	0	1	0	2	2.14	4.52	0
66	11	18.3	0	2	5	0	0	0	2	1	9	1	0	0	1	1	0	2	0.55	1.31	0
67	11	17.2	0	0	0	0	0	0	2	1	2	0	0	0	0	2	0	2	1.1	3.07	0
67	15	21.4	0	0	0	0	0	0	2	1	2	0	0	0	0	2	0	2	2.57	4.4	0
69	0	8.9	0	1	1	0	2	0	1	1	5	0	0	1	0	1	0	2	1.37	3.2	0
70	11	16.9	0	3	0	3	0	0	3	1	9	1	0	0	0	2	0	2	1.18	2.41	0
47	10	15.3	1	1	0	1	0	0	2	2	5	0	0	0	1	1	0	2	1.09	3.16	0
59	6	11.1	0	1	0	2	1	0	0	2	4	0	1	0	1	0	0	2	2.1	4.25	0
60	5	9.5	0	1	1	0	1	1	2	2	6	0	0	1	0	1	0	2	1.19	2.53	0
62	5	16.5	0	5	0	0	0	5	3	3	13	1	0	0	0	2	0	2	1.35	5.34	0
63	11	11.6	1	0	0	0	1	1	3	4	6	0	1	0	0	1	0	2	1.14	2.34	0
62	5	9.2	0	0	0	0	4	0	4	0	8	1	0	0	0	3	0	3	1.13	3.14	1
80	8	4.2	0	0	0	5	3	0	0	0	8	1	2	1	0	0	0	3	2.13	4.02	1
48	11	9	0	0	0	0	1	2	2	0	5	0	1	0	1	1	0	3	1.2	2.37	0
49	15	28.7	0	0	0	0	0	1	1	0	2	0	2	0	0	1	0	3	0.51	2.46	0
50	11	14.7	1	1	2	0	2	0	1	0	7	0	0	1	1	1	0	3	1.33	2.53	0
55	8	28.3	0	0	0	0	0	0	0	0	0	0	3	0	0	0	0	3	1.34	2.53	0
64	15	18	0	5	0	0	0	0	2	0	7	0	2	0	0	1	0	3	1.55	6.07	0
66	11	4.5	1	0	0	0	1	0	1	0	3	0	0	1	1	1	0	3	1.27	3.48	0
69	1	18.9	2	0	0	2	1	2	2	0	9	1	1	0	1	1	0	3	2.02	4.19	0
47	11	28.8	2	1	2	3	0	0	3	1	11	1	1	0	0	2	0	3	1.35	3.47	0
49	15	30.1	0	1	0	1	1	0	2	1	5	0	1	1	0	1	0	3	0.38	1.34	0
54	5	33.8	0	0	0	0	0	0	3	1	3	0	0	0	0	3	0	3	2.11	3.55	0
57	8	10.8	1	2	1	0	0	0	2	1	6	0	1	0	1	1	0	3	1.1	1.44	0
58	15	21.5	0	0	0	1	0	1	2	1	4	0	1	1	0	1	0	3	1.03	3.07	0
59	7	12.7	1	1	0	0	0	0	2	1	4	0	1	0	1	1	0	3	2.46	6.4	0
60	11	27.8	1	1	1	0	1	1	0	1	5	0	1	1	1	0	0	3	1.01	2.02	0
62	5	16.7	0	1	0	0	1	0	3	1	5	0	0	1	0	2	0	3	1.04	2.35	0
62	15	33.9	0	2	0	0	0	1	3	1	6	0	1	0	0	2	0	3	1.19	3.05	0
64	11	13.2	2	0	0	0	2	0	2	1	6	0	0	1	1	1	0	3	1.06	3.25	0
68	11	18.4	0	0	1	0	0	0	2	1	3	0	0	2	0	1	0	3	1.13	3	0
71	8	5.4	0	1	0	0	1	0	3	1	5	0	0	1	0	2	0	3	1.05	2.36	0
74	5	7.5	5	0	0	1	0	5	1	1	12	1	1	0	1	1	0	3	1.11	3.07	0
75	4	14	1	0	0	0	2	0	1	1	4	0	1	1	0	1	0	3	1.28	3.03	0
51	15	24.3	0	0	0	0	0	0	1	2	1	0	0	1	0	2	0	3	2.09	2.39	0
56	11	9.1	1	1	0	1	1	0	2	2	6	0	1	0	1	1	0	3	1.17	2.58	0
63	8	14.7	1	0	0	0	1	1	2	2	5	0	1	1	0	1	0	3	1.38	2.49	0
64	11	25.6	0	1	0	3	1	0	3	2	8	1	0	1	0	2	0	3	2.3	5	0
57	10	13.3	2	1	0	1	2	0	0	3	6	0	1	1	1	0	0	3	1.07	3.07	0
62	15	8.5	0	5	5	0	0	0	5	3	15	1	0	0	0	3	0	3	1.12	4.46	0
66	11	7.3	1	0	2	1	1	3	2	3	10	1	1	0	1	1	0	3	1.14	1.15	0
75	15	9.3	0	0	3	0	3	0	2	3	8	1	2	0	0	1	0	3	1.32	3.02	0
51	15	10	0	0	0	0	5	0	2	0	7	0	0	3	0	1	0	4	0.54	1.51	0
65	11	3.9	1	1	1	0	3	1	0	0	7	0	1	2	1	0	0	4	0.26	1.2	0
68	15	15.9	0	1	0	0	2	0	3	0	6	0	1	1	0	2	0	4	1.04	2.31	0
40	11	41.3	0	0	0	0	0	0	5	1	5	0	1	0	0	3	0	4	2.24	2.43	0
47	10	4.5	1	0	0	1	0	0	3	1	5	0	1	1	1	1	0	4	0.39	2.37	0
52	11	19.3	0	3	0	0	0	0	0	1	3	0	3	0	0	1	0	4	1.22	2.55	0
53	11	20	1	4	0	5	0	1	2	1	13	1	0	0	3	1	0	4	1.14	2.01	0
73	5	8	1	3	3	0	4	0	1	1	12	1	0	1	2	1	0	4	2.36	3.13	0
77	11	14.2	0	0	0	1	2	0	1	1	4	0	1	1	1	1	0	4	0.53	2.31	0
50	10	32.8	0	5	0	0	0	0	1	2	6	0	3	0	0	1	0	4	1.31	4.43	0
58	8	10.9	4	0	4	2	0	2	2	2	14	1	1	1	1	1	0	4	1.23	1.33	0
64	15	13.4	3	5	1	0	2	0	3	2	14	1	0	1	1	2	0	4	0.5	1.15	0
72	1	8.6	0	0	0	0	0	3	3	3	6	0	2	0	0	2	0	4	1.02	2.12	1
49	11	29.4	1	2	0	1	0	0	1	1	5	0	0	2	2	1	0	5	1.28	2.14	0
50	15	35.3	0	1	0	0	1	0	2	1	4	0	0	1	1	3	0	5	1.2	3.44	0
52	11	13.3	1	0	0	0	1	0	0	1	2	0	3	1	1	0	0	5	1.52	3.19	0
59	1	29.9	1	1	1	0	1	1	1	1	6	0	1	2	1	1	0	5	1.2	1.55	0
62	11	11.9	0	0	0	0	0	0	3	1	3	0	3	0	0	2	0	5	1.42	3.25	0
50	11	13	2	4	3	0	3	2	5	2	19	1	0	1	1	3	0	5	1.48	4.23	0
54	8	33.4	5	2	0	1	0	0	3	2	11	1	3	0	0	2	0	5	0.34	2.17	0
57	11	16.3	2	5	3	0	0	2	2	2	14	1	1	0	2	2	0	5	1.17	3.04	0
72	5	6	5	0	0	5	0	0	4	2	14	1	1	0	1	3	0	5	1.33	2.43	0
69	11	7.8	0	0	0	0	5	0	3	3	8	1	0	2	1	2	0	5	1.46	2.38	0
57	15	10.7	0	1	1	1	0	0	3	1	6	0	3	1	0	2	0	6	1.31	4.04	0
53	8	15.7	2	2	0	0	2	2	5	2	13	1	1	1	1	3	0	6	1.32	2.59	1
78	4	6.9	1	3	0	5	4	0	4	2	17	1	3	0	0	3	0	6	1.57	3.45	1
53	14	7	1	2	4	4	2	1	0	2	14	1	3	2	1	0	0	6	1.02	2.21	0
78	1	28.4	0	0	0	0	0	0	0	3	0	0	0	3	3	0	0	6	1.34	2.18	1
70	6	12.9	5	0	4	5	2	0	2	1	18	1	3	0	3	1	0	7	2.11	2.2	1
65	5	6.6	0	4	0	0	4	4	3	1	15	1	1	3	1	2	0	7	1.35	2.39	0
56	9	7.5	5	2	5	4	5	0	2	3	23	2	1	3	2	1	0	7	1.01	2.1	0
56	11	31.4	0	5	5	5	5	0	2	3	22	2	1	2	1	3	0	7	1.35	2.3	0
87	1	23	5	0	3	0	3	0	2	1	13	1	3	0	2	3	0	8	2.14	1.59	1
72	1	13	5	2	0	1	2	0	3	1	13	1	2	3	3	1	0	9	4.15	4.57	0
66	10	10.7	5	5	3	0	0	0	3	4	16	1	1	3	3	3	0	10	1.4	5.44	0
62	8	13.7	5	2	5	5	5	0	3	5	25	2	2	2	3	3	0	10	1.3	3.24	0
68	4	2.5	5	0	4	5	5	0	5	6	24	2	2	3	2	3	0	10	1.5	2.53	0
56	11	16.9	0	1	0	0	0	0	1	0	2	0	0	0	0	1	1	1	2.58	4.53	0
59	15	27.9	0	1	0	0	0	0	3	1	4	0	0	0	0	1	1	1	1.24	2.51	0
45	11	11.8	0	1	0	0	0	1	2	5	4	0	0	0	0	1	1	1	1.45	3.23	0
51	14	18.6	0	1	0	0	0	0	1	0	2	0	0	1	0	1	1	2	1.46	4.47	0
51	15	16.9	0	1	0	0	0	0	2	1	3	0	0	0	0	2	1	2	0.53	2.33	0
75	1	19.1	3	0	0	0	3	0	0	3	6	0	0	1	0	1	1	2	1.36	3.02	1
47	5	25.4	0	1	0	0	0	0	1	3	2	0	0	1	0	1	1	2	2.01	3.5	0
53	11	11.4	1	0	2	0	2	3	0	3	8	1	0	1	1	0	1	2	0.53	2.22	0
57	11	20.2	3	2	0	0	0	0	0	4	5	0	0	0	2	0	1	2	0.35	2.39	0
61	4	6.4	5	1	1	0	1	1	1	4	10	1	0	1	0	1	1	2	2.07	2.23	0
47	15	12.1	3	1	0	0	1	0	2	1	7	0	0	1	1	1	1	3	1.22	2.22	0
51	11	16	0	4	0	0	0	0	2	1	6	0	0	1	1	1	1	3	1.51	2.41	0
59	15	12.8	1	5	5	0	0	0	2	1	13	1	0	0	2	1	1	3	3.19	6.5	0
76	15	3.5	1	0	2	0	3	0	2	2	8	1	0	1	1	1	1	3	1.46	5.45	0
49	15	7.9	1	5	1	0	5	0	2	3	14	1	2	0	0	1	1	3	1.16	1.4	0
53	11	11.3	2	1	0	0	1	0	0	3	4	0	0	1	2	0	1	3	1.04	2.41	0
64	11	12.2	1	0	1	0	1	0	2	3	5	0	0	1	1	1	1	3	1.07	2.1	0
66	15	25.9	3	0	0	0	2	0	0	3	5	0	0	1	2	0	1	3	1.29	2.2	0
71	15	8.8	5	5	5	0	4	0	2	3	21	2	0	1	1	1	1	3	1.46	3.32	0
78	0	21.4	2	0	0	2	2	0	2	3	8	1	1	1	0	1	1	3	3.01	4.5	0
50	11	8.9	1	1	0	0	1	0	3	1	6	0	0	1	1	2	1	4	1.15	2.45	0
59	11	11.7	0	3	1	0	5	0	1	1	10	1	0	3	0	1	1	4	0.58	1.53	0
59	11	12.9	1	0	1	0	1	2	2	1	7	0	0	1	2	1	1	4	1.24	3.36	0
59	11	13.2	1	1	0	0	2	1	1	1	6	0	1	1	1	1	1	4	1.31	1.22	0
62	11	15.4	3	2	1	0	0	0	0	1	6	0	2	1	1	0	1	4	1.51	3.42	0
65	4	9.8	0	2	1	2	3	0	1	1	9	1	1	2	0	1	1	4	0.41	2.41	0
64	14	16.4	1	0	1	0	1	0	2	2	5	0	1	1	1	1	1	4	2.29	3.22	0
71	11	22.2	1	1	0	1	1	0	3	2	7	0	1	0	0	3	1	4	1.28	3.28	0
80	4	25.8	5	2	0	0	2	0	2	3	11	1	1	1	1	1	1	4	3.24	7.38	1
42	15	18.8	3	5	0	0	2	5	2	3	17	1	0	1	2	1	1	4	0.38	1.11	0
68	5	19.7	0	1	0	1	3	0	0	3	5	0	2	2	0	0	1	4	0.2	2.56	0
75	15	12.7	0	1	2	0	1	0	3	3	7	0	1	1	0	2	1	4	1.12	2.57	0
58	15	14.4	1	1	2	1	2	1	0	4	8	1	1	1	2	0	1	4	1.54	3.51	0
70	11	22.7	0	1	2	4	0	0	3	4	10	1	1	1	0	2	1	4	1.39	2.55	0
53	13	22.8	0	0	0	0	4	4	5	6	13	1	0	1	0	3	1	4	1.55	6.47	0
56	3	5.5	0	1	0	0	1	0	3	1	5	0	1	1	1	2	1	5	1.32	3.37	0
63	5	26	0	0	2	3	4	2	0	1	11	1	1	2	2	0	1	5	2.3	4.31	0
43	15	18.7	0	2	5	1	5	1	3	3	17	1	0	2	1	2	1	5	1.57	3.26	0
56	11	21.2	0	3	0	5	0	0	3	3	11	1	3	0	0	2	1	5	1.19	2.15	0
56	11	6.6	2	2	3	1	4	0	3	3	15	1	1	1	1	2	1	5	2.33	5.18	0
58	8	29.3	5	5	5	0	0	0	3	3	18	1	0	0	3	2	1	5	1.15	3.05	0
65	11	16	0	1	5	5	0	0	3	3	14	1	3	0	0	2	1	5	2.09	3.44	0
65	4	9.1	3	2	5	3	2	5	2	3	22	2	2	1	1	1	1	5	2.35	4.56	0
67	11	9.1	2	2	3	1	1	1	3	3	13	1	1	1	1	2	1	5	0.51	1.57	0
69	0	20.1	0	3	2	0	3	0	2	3	10	1	1	1	2	1	1	5	3.4	4.29	0
70	8	4.9	1	2	3	1	1	1	1	3	10	1	1	2	1	1	1	5	1.14	2.5	0
73	11	15.6	5	5	5	0	3	0	1	3	19	1	2	1	2	0	1	5	1.47	2.38	0
77	5	23.8	3	1	2	0	1	0	3	3	10	1	0	2	0	3	1	5	1.32	3.19	0
64	11	9.3	1	2	1	5	5	1	0	4	15	1	1	3	1	0	1	5	2.03	7.29	0
66	8	17.5	5	5	0	2	2	0	1	4	15	1	2	0	2	1	1	5	0.37	1.46	0
47	10	29.2	1	2	0	0	0	0	2	1	5	0	3	0	0	3	1	6	1.38	3.49	0
62	11	13.4	1	3	1	0	1	0	3	1	9	1	1	0	3	2	1	6	2.24	3.34	0
66	8	20.3	5	4	3	5	0	0	3	3	20	2	3	0	1	2	1	6	1.44	1.26	1
59	15	8.5	1	5	5	0	5	2	5	3	23	2	1	1	1	3	1	6	2.4	4.34	0
60	11	11.6	1	5	2	0	0	0	3	3	11	1	1	0	3	2	1	6	1.28	4.18	0
76	5	19	5	0	0	0	5	0	1	3	11	1	0	2	3	1	1	6	2.32	5.03	0
70	5	11.2	0	0	5	5	5	0	3	4	18	1	3	1	0	2	1	6	1.19	2.48	1
74	8	5.1	0	1	0	0	5	0	3	6	9	1	0	2	2	2	1	6	2.06	5.03	1
56	11	8.9	1	1	1	5	0	0	1	3	9	1	1	2	3	1	1	7	1	2.13	1
74	4	12.3	0	0	0	5	5	0	2	3	12	1	3	3	0	1	1	7	1.01	2.56	1
51	11	2.2	5	1	0	0	5	0	3	3	14	1	1	3	1	2	1	7	2.34	3.4	0
63	11	6	0	0	1	2	5	4	0	6	12	1	2	3	2	0	1	7	1.27	2.55	0
59	1	12.4	0	1	0	5	5	0	5	3	16	1	3	2	0	3	1	8	1.35	2.32	0
61	15	13.2	4	3	3	1	5	5	2	3	23	2	2	3	3	1	1	9	1.09	2.1	0
80	15	11.2	0	1	1	4	2	3	3	3	14	1	1	3	3	2	1	9	1.34	2.26	0
55	15	13.7	0	0	0	1	1	0	1	6	3	0	0	0	0	1	2	1	1.11	2.57	0
59	8	24.9	0	5	0	0	0	0	2	4	7	0	1	0	0	1	2	2	1	4.09	0
48	11	15.7	1	0	2	0	0	0	0	5	3	0	0	1	1	0	2	2	1.37	2.23	0
62	11	19.3	0	2	0	2	2	0	3	0	9	1	0	0	1	2	2	3	1.26	3.26	0
70	4	4.6	0	2	0	0	3	0	2	3	7	0	0	2	0	1	2	3	1.49	6.47	0
43	15	13.4	0	1	0	0	0	0	5	4	6	0	0	0	0	3	2	3	0.31	1.45	0
50	11	16.5	1	2	4	0	2	0	2	4	11	1	0	1	1	1	2	3	2.21	4.36	0
60	15	2.8	2	1	1	0	3	1	1	4	9	1	0	1	1	1	2	3	1.13	3.58	0
65	15	7.4	0	0	0	0	0	0	5	4	5	0	0	0	0	3	2	3	1.06	1.27	0
60	15	8.9	0	5	0	0	0	0	0	6	5	0	0	0	3	0	2	3	1.41	4.52	0
73	5	7.3	0	0	0	0	0	0	3	4	3	0	1	1	0	2	2	4	2.05	7.08	1
58	8	18.2	5	1	0	0	1	0	5	4	12	1	1	1	1	1	2	4	1.4	3.11	0
60	15	4.3	4	4	4	0	0	1	3	4	16	1	0	0	2	2	2	4	1.35	2.24	0
70	13	13.2	0	1	0	0	1	0	2	4	4	0	1	2	0	1	2	4	2.51	1.48	0
50	11	23.2	5	1	0	0	1	0	2	6	9	1	1	1	1	1	2	4	1.03	3.46	0
61	1	30.2	0	5	0	3	0	0	5	6	13	1	1	0	0	3	2	4	1.04	2.12	0
64	10	12	0	1	5	0	5	5	2	6	18	1	0	3	0	1	2	4	0.51	3.13	0
71	11	10.5	0	1	0	1	0	0	3	6	5	0	2	0	0	2	2	4	2.04	3.52	0
82	15	10	2	1	0	3	3	0	0	3	9	1	2	2	1	0	2	5	2.02	5.03	0
75	11	13.1	1	1	2	1	0	0	5	4	10	1	1	0	1	3	2	5	2.4	2.48	0
57	6	6.1	1	2	3	5	2	2	2	5	17	1	2	1	1	1	2	5	1.39	4.18	0
66	5	16	5	4	4	2	4	2	2	5	23	2	1	2	1	1	2	5	1.15	2.59	0
66	15	15.1	0	3	0	3	0	0	3	5	9	1	3	0	0	2	2	5	2.58	5.21	0
60	8	19	5	0	0	0	5	0	3	6	13	1	0	3	0	2	2	5	4.23	6.12	0
56	5	15	1	0	0	1	0	0	3	3	5	0	2	0	2	2	2	6	1.44	3.32	0
65	1	10.7	0	0	1	2	4	4	5	3	16	1	1	2	2	1	2	6	2.14	4.07	0
58	15	6.9	1	2	1	0	2	4	1	4	11	1	0	2	3	1	2	6	0.5	3.04	0
59	15	4.8	5	5	5	5	3	0	4	4	27	2	0	1	2	3	2	6	1.36	4.28	0
62	5	21.7	4	1	3	2	2	1	3	4	16	1	1	1	2	2	2	6	1.32	6.26	0
64	11	7.6	3	4	4	2	2	1	2	4	18	1	2	1	2	1	2	6	1.06	1.39	0
73	3	6.7	0	1	0	0	0	0	5	4	6	0	1	1	1	3	2	6	1.48	3.51	0
54	15	18.8	1	2	5	2	2	1	2	5	15	1	1	2	2	1	2	6	1.49	2.49	0
70	4	2.3	5	0	0	0	0	0	5	6	10	1	0	0	3	3	2	6	1.17	3.27	0
69	5	9.8	1	2	2	0	4	2	2	0	13	1	1	2	3	1	2	7	1.38	4.51	0
69	11	5	1	1	2	1	3	0	3	3	11	1	1	1	3	2	2	7	1.17	2.27	1
50	11	15.1	3	5	4	3	3	1	3	3	22	2	1	2	2	2	2	7	0.59	3.45	0
53	5	10.1	3	4	1	1	2	0	1	4	12	1	1	2	3	1	2	7	1.5	3.25	0
58	15	12.1	5	5	0	5	5	0	2	4	22	2	3	1	2	1	2	7	1.35	1.56	0
58	11	6.4	2	2	1	2	2	1	2	4	12	1	2	2	2	1	2	7	1.37	2.45	0
59	13	6.9	2	2	4	1	3	1	3	5	16	1	1	2	2	2	2	7	1.22	2.33	0
59	14	6.4	4	2	3	0	2	3	1	5	15	1	1	2	3	1	2	7	1.52	3.42	0
46	15	12.7	5	5	4	0	4	5	5	6	28	2	0	1	3	3	2	7	0.54	3.52	0
66	5	32.9	0	1	2	1	3	4	3	0	14	1	2	1	3	2	2	8	1.55	2.14	0
61	5	8.7	5	0	0	5	5	5	0	3	20	2	2	3	3	0	2	8	1.26	2.2	1
47	5	16.1	4	5	5	5	5	5	3	3	32	2	3	2	1	2	2	8	2.23	4.53	0
55	11	7.8	3	5	2	3	2	0	5	4	20	2	2	2	2	2	2	8	1.01	3.28	1
52	11	14	5	3	5	2	5	5	2	5	27	2	1	3	3	1	2	8	1.44	2.18	0
53	8	22.7	5	1	0	0	2	1	3	6	12	1	2	3	1	2	2	8	1.28	5.08	1
64	15	16.3	5	0	0	1	1	0	3	6	10	1	2	2	2	2	2	8	2.3	4.44	0
72	5	2	5	5	1	5	5	0	5	4	26	2	3	2	1	3	2	9	1.43	5.03	1
51	11	11.9	5	5	5	4	5	4	3	6	31	2	1	3	3	2	2	9	1.34	2.54	0
45	11	18.4	5	5	0	5	3	0	2	6	20	2	3	3	3	1	2	10	0.46	5.46	0
70	8	10.1	5	5	5	0	5	5	3	6	28	2	2	3	3	2	2	10	1.03	1.5	0
52	8	33.7	3	4	0	0	1	5	3	1	16	1	3	3	3	2	2	11	2.32	8.3	0
69	11	4.5	0	5	5	5	3	0	3	4	21	2	3	2	3	3	2	11	1.2	3.26	0
45	11	12.1	4	5	4	4	5	5	5	6	32	2	3	3	3	3	2	12	0.41	1.1	0
53	15	4.3	1	2	5	5	5	5	5	6	28	2	3	3	3	3	2	12	1.27	2.37	0
55	11	14.6	0	1	0	0	5	5	1	0	12	1	0	1	1	1	0	3	1.45	3.14	0

## Sheet: Legends
Flowmax = Maxime Flow
IPSS 1 = Question 1
IPSS 2 = Question 2
.......
IPSS 7 = Question 7
SCOIPSS Total score IPSS
UWIN 1 = Question 1
......
UWIN4 = Question 4
QOL = quality of life
tap= time of aplication in minutes
																				7.04
																				5.15
ClassIPSS		0=Mild
		1=Moderate
		2=Severe
Education = years of education
mod = APLICATION MODE
	0 = Questionnaire
	1 = Interview
